# Supplementary material for: Monitoring Biofilm Formation and Microbial Interactions that May Occur During a Salmonella Contamination Incident across the Network of a Water Bottling Plant
Source: MDPI journal article supplement (doi:10.3390/microorganisms7080236), 2019-08-02
Supplement: s1 [file s1]

Table S1. Identity of isolated bands from PCR-DGGE fingerprints of mixed communities as recovered from membrane filter of collected samples from the water bottling plant after sequencing of the variable V6-V8 region of 16S rRNA genes

| Band <sup>1</sup> | Closest relative            | Identity (%) | GenBank accession no. of closest relative |
|-------------------|-----------------------------|--------------|-------------------------------------------|
| B1                | <i>Citrobacter</i> spp.     | 99           | KM187140                                  |
| B2                | <i>Staphylococcus</i> spp.  | 100          | MG162677                                  |
| B3                | <i>Staphylococcus</i> spp.  | 99           | MK942713                                  |
| B4                | <i>Pseudomonas</i> spp.     | 100          | MF144455                                  |
| B5                | <i>Bacillus</i> spp.        | 97           | MK660034                                  |
| B6                | <i>Exiguobacterium</i> spp. | 100          | KC160692                                  |

<sup>1</sup> Bands are indicated in Figure 1

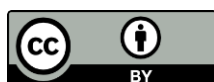

© 2019 by the authors. Licensee MDPI, Basel, Switzerland. This article is an open access article distributed under the terms and conditions of the Creative Commons Attribution (CC BY) license (<http://creativecommons.org/licenses/by/4.0/>).
